# Supplementary material for: Taiman acts as a coactivator of Yorkie in the Hippo pathway to promote tissue growth and intestinal regeneration
Source: PubMed Central journal article supplement (PMC4860958; doi:10.1038/celldisc.2016.6), 2016-03-22
Supplement: celldisc20166-s2.pdf [file celldisc20166-s2.pdf]

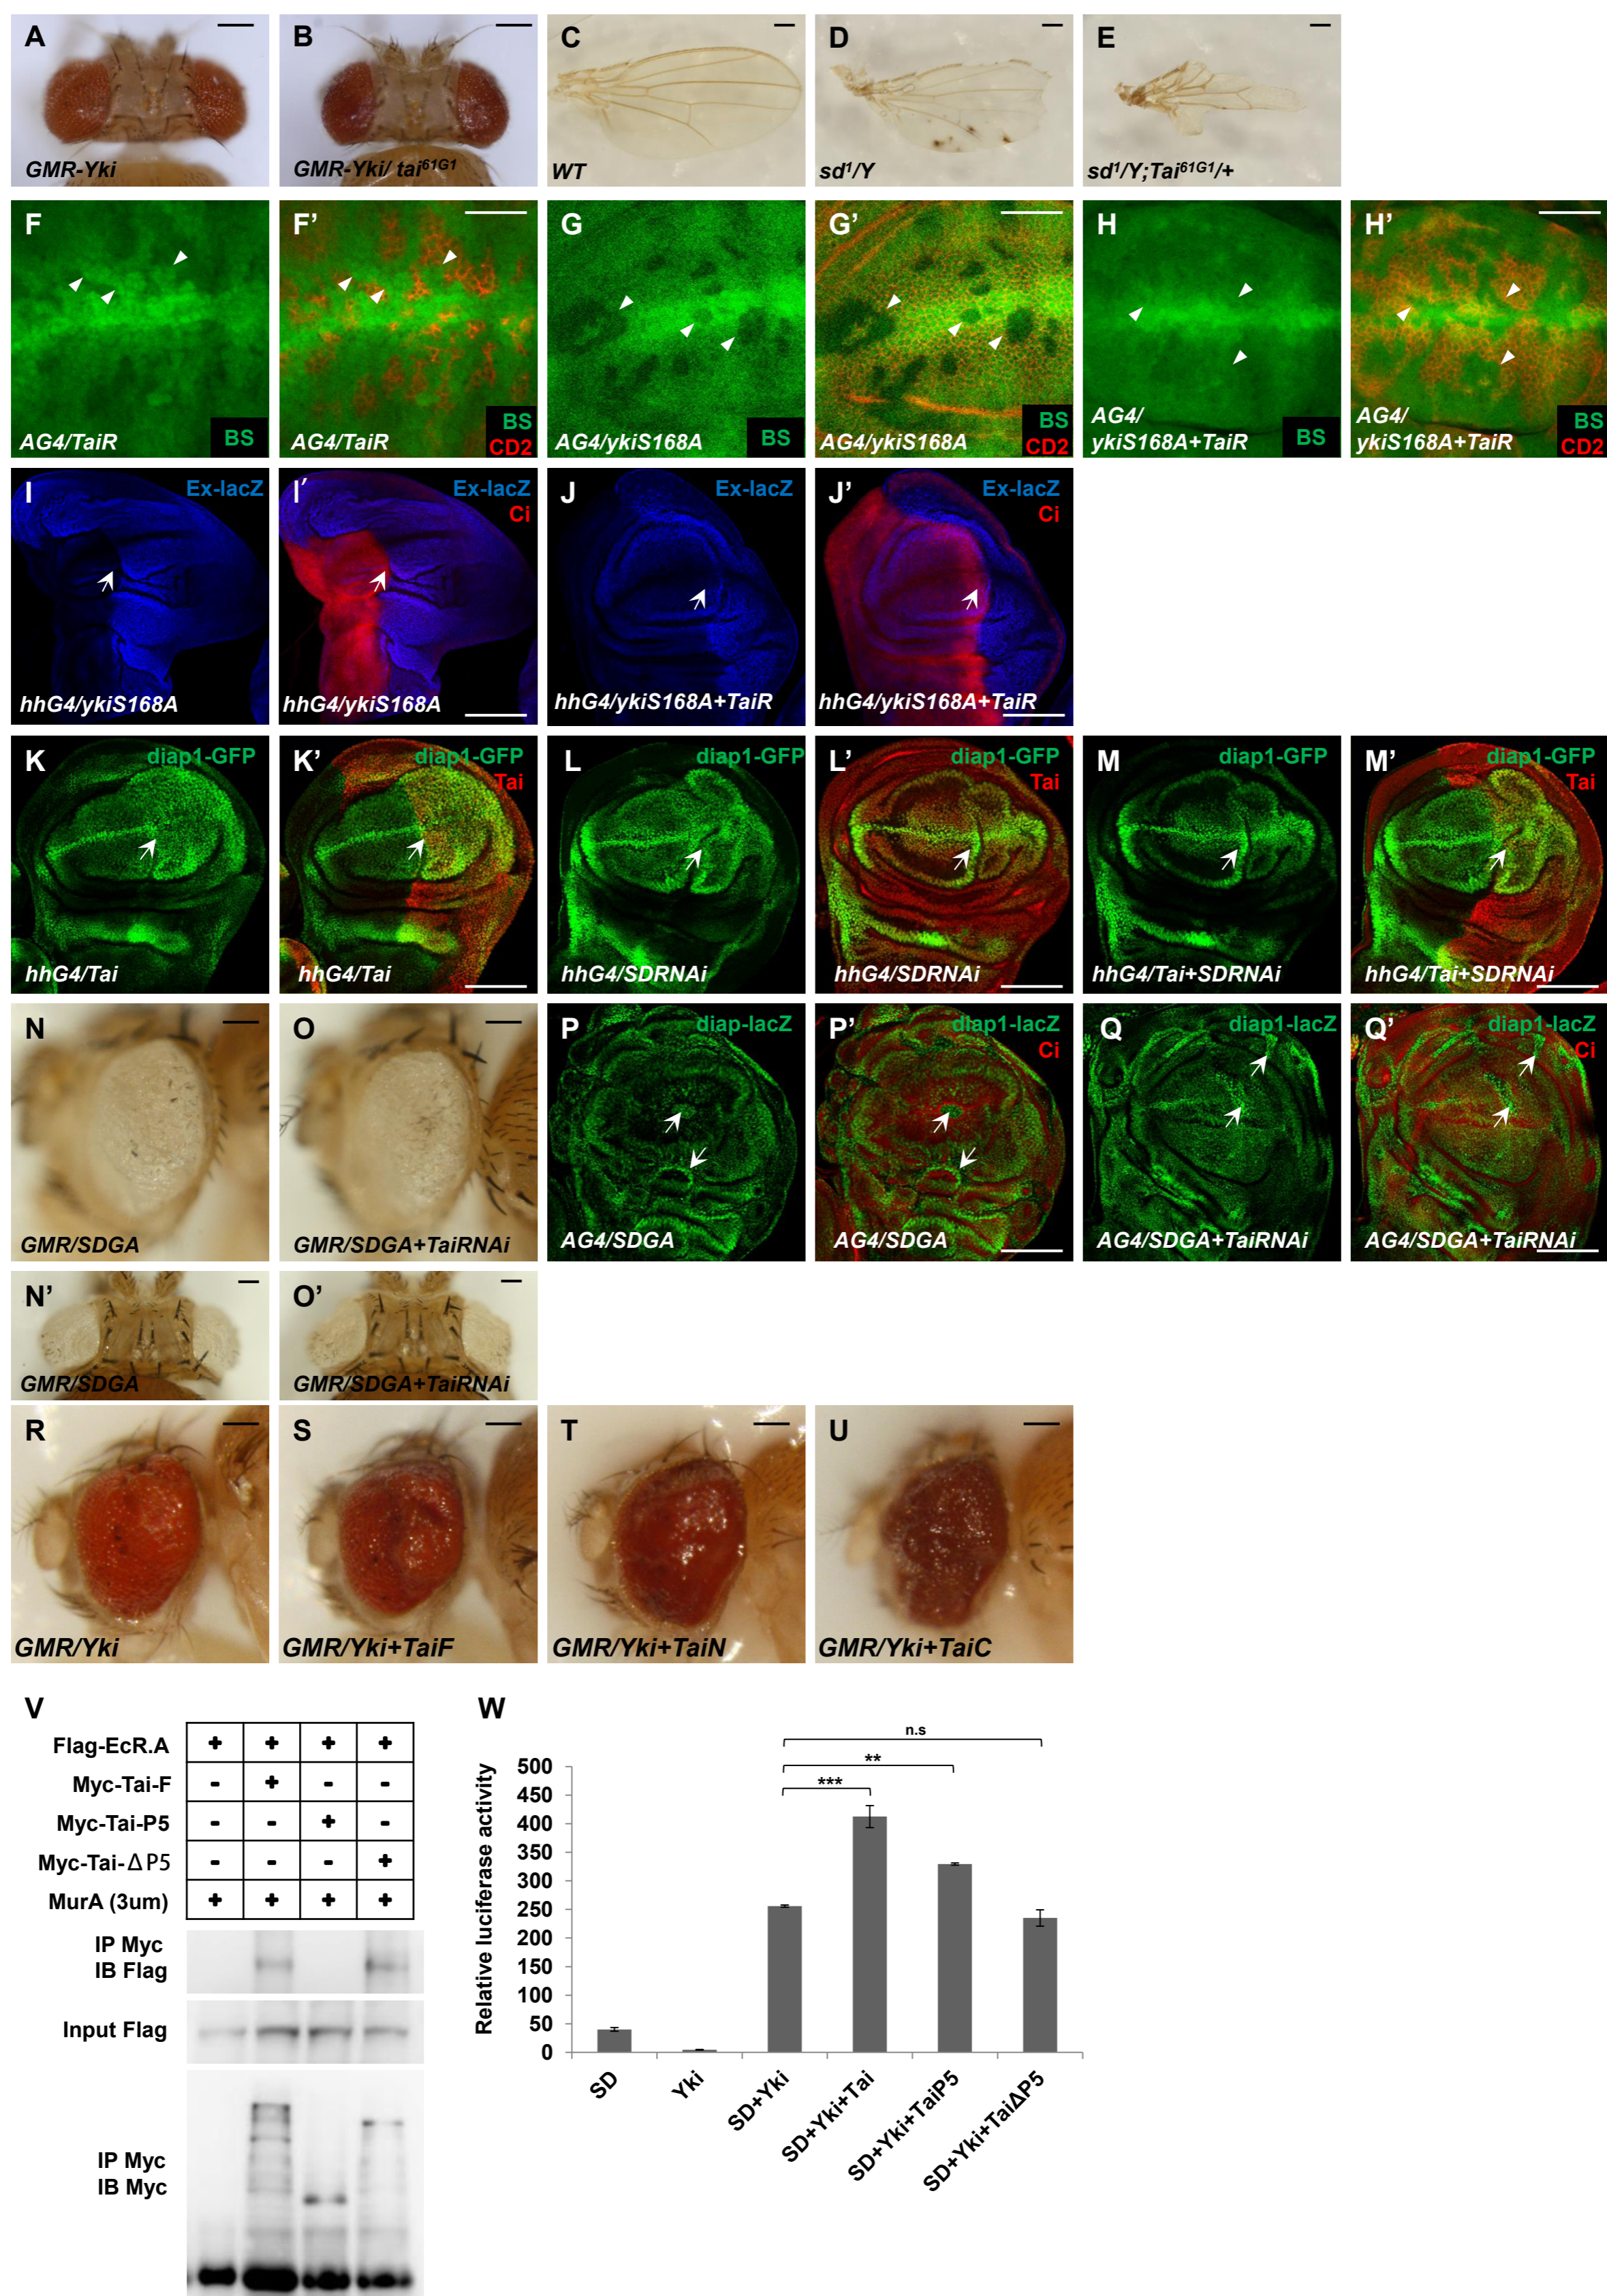

Supplementary Figure 2. Genetic interaction analysis and TaiC function.

(A, B) Side views of the adult flies with indicated genotypes. *GMR-Yki* (A), *GMR-Yki/tai<sup>61G1</sup>* (B). Scale bars, 100μm. (C-E) Side views of the adult flies with indicated genotypes. Scale bars, 250μm. (F-H') *Drosophila* discs containing flip-out clones expressing *TaiRNAi* (F,F') or *ykiS168A* (G,G') or *ykiS168A+TaiRNAi* (H,H') under the control of *act>CD2>Gal4* (*AG4*) were immunostained to show the expression of *bantam-GFP* (BS). Clones were marked by the lack of CD2 staining and indicated by arrowheads. Scale bars, 100μm. (I-J') *Tai* RNAi could not suppress the increase of *ex-lacZ* level induced by *Yki*. Wing discs expressing *ykiS168A* (I, I') or *ykiS168A+TaiRNAi* (J, J') under the control of *hh-Gal4* were immunostained to show the expression of *ex-lacZ*. P-compartment is marked by the overexpressed *Tai* and indicated by the arrows. Scale bars, 100μm. (K-M') Wing discs expressing *Tai* (K, K') or *SdRNAi* (L, L') or *Tai+SdRNAi* (M, M') under the control of *hh-Gal4* were immunostained to show the expression of *diap1-GFP*. P-compartment is marked by the overexpressed *Tai* and indicated by the arrows. Scale bars, 100μm. (N-O') Side (N, O) and dorsal (N', O') views of eyes expressing *SdGA* (N, N') or *SdGA+TaiRNAi* (O, O') with *GMR-Gal4*. Scale bars, 100μm. (P-Q') *Drosophila* discs containing flip-out clones expressing *SdGA* (P, P') or *SdGA+TaiRNAi* (Q, Q') by *act>CD2>Gal4* were immunostained to show the expression of *diap1-lacZ*. Clones were indicated by the lack of CD2 staining and arrowheads. Scale bars, 100μm. (R-U) Side views of eyes expressing *Yki* (R), *Yki+Tai* (S), *Yki+TaiN* (T) or *Yki+TaiC* (U) with *GMR-Gal4*. Scale bars, 100μm. (V) CoIP of Myc-tagged *Tai*, *Tai-P5*, *Tai-ΔP5* and *Flag-EcR.A*. S2 cells were transfected with indicated constructs, followed by immunoprecipitation and western blot analysis with indicated antibodies. (W) *Tai* or *Tai-P5* acts synergistically with *Sd-Yki* to activate *3xSd2-luc* reporter gene while *Tai-ΔP5* could not. S2 cells were transfected with indicated constructs and luciferase reporter gene, followed by dual luciferase assay. The data was quantified using an unpaired t-test. The results represented the mean ± SEM. \*\*\* means  $p < 0.001$ , \*\* means  $p < 0.01$ , \* means  $p < 0.1$ , n.s means no significant difference ( $n=3$ ).
